# Supplementary material for: Exploring drug-target interaction networks of illicit drugs
Source: PubMed Central journal article supplement (PMC3849475; doi:10.1186/1471-2164-14-s4-s1), 2013-10-01

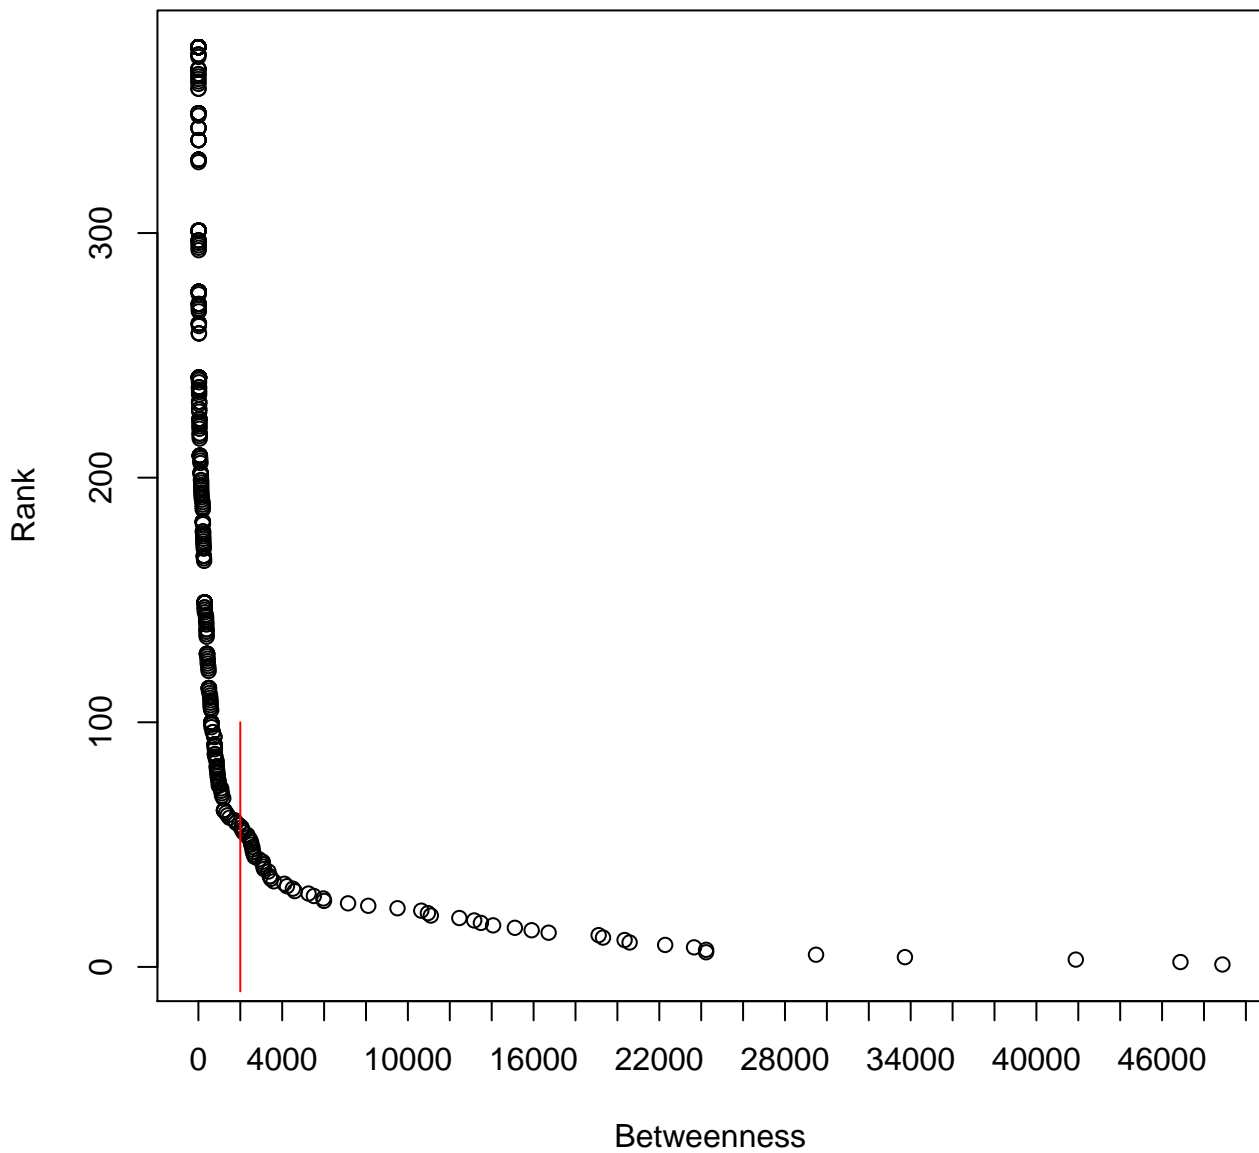

Supplement: 1471-2164-14-S4-S1-S7.pdf [file 1471-2164-14-S4-S1-S7.pdf]
